# Supplementary material for: Prospective evaluation of NGS-based sequencing in epilepsy patients: results of seven NASGE-associated diagnostic laboratories
Source: Front Neurol. 2023 Dec 6;14:1276238. doi: 10.3389/fneur.2023.1276238 (PMC10731269; doi:10.3389/fneur.2023.1276238)
Supplement: Supplementary Table 1 — Actionable genes in epilepsy. List of genes as published by McKnight et al. (6). [file Data_Sheet_1.xlsx]

## Sheet: Table 1
Actionable Genes, McKnight et al. Neurology Genetics 2021	please refere to eTable 3, Neurol Genet. 2021 Dec 16;8(1):e650. doi: 10.1212/NXG.0000000000000650. eCollection 2022 Feb. PMID: 34926809
ALDH7A1
ATP1A3
CACNA1A
CDKL5
CHD2
DEPDC5
EPM2A
GLRA1
KCNH2
KCNQ2
KCNT1
LGI1
NHLRC1
NPRL3
PCDH19
PRRT2
SCN1A
SCN2A
SCN8A
SLC2A1
SLC6A1
SLC6A8
STXBP1
TSC1
TSC2
other
POLG

## Sheet: Table 2
Top genetic etiologies:	Genes (#83)	Cases per gene (#109)	cumulativ cases #		Top mutated Genes %				Actionability	all patient				≤12			>12
1	SCN1A	11	11		>/=3 cases per genetic etiology	case	%			Actionable Genes in this study (#17)	Actiobale cases (this study #37)	possible modes of action		Actionable Genes in this study (#13)	Actiobale cases (this study #26)		Actionable Genes in this study (#8)	Actiobale cases (this study #11)
2	SETD1B	5	16		top genes/all (317 cases)	34	0.107256			SCN2A	3			SCN2A	2		SCN2A	1
3	CACNA1A	5	21		top genes/ UV_PV (109 cases)	34	0.311927			STXBP1	1	ASM		STXBP1	1		SCN8A	2
4	SCN8A	4	25		Gene affected by < 3 cases	75	0.688073			CDKL5	1	ASM		CDKL5	1		EPM2A	1
5	SCN2A	3	28							SCN1A	11	ASM		SCN1A	8		POLG	1
6	MECP2	2	30							PRRT2	1	ASM		PRRT2	1		ATP1A3	1
7	SLC2A1	2	32							KCNT1	1	ASM, metabolic		KCNT1	1		SCN1A	3
8	CDC6	2	34							TSC2	1	ASM, surgery		TSC2	1		SLC2A1	1
9	SETD2	1	35							SCN8A	4	ASM		SCN8A	2		KCNQ2	1
	ETHE1	1	36							CACNA1A	5	treatment of ataxia, migraine		CACNA1A	5
	STXBP1	1	37							SLC6A1	1	metabolic		SLC6A1	1
	KIF5C	1	38							SLC2A1	2	ASM, metabolic		SLC2A1	1
	CASK	1	39							SLC6A8	1	metabolic		SLC6A8	1
	JAM3	1	40							PCDH19	1	ASM, metabolic		PCDH19	1
	CAD	1	41							EPM2A	1	ASM			26			11
	PACS2	1	42							POLG	1	ASM
	MT-TK	1	43							ATP1A3	1	treatment of hemiplegia of childhood
	CDKL5	1	44							KCNQ2	1	ASM
	SNAP25	1	45								37
	SLC13A5	1	46
	CSNK2B	1	47
	CAMTA1	1	48
	ANKRD11	1	49
	FLNA	1	50							cases	%			cases	%			cases	%
	SLC1A3	1	51						all	317	0.116719			235	0.110638			82	0.134146
	RORA	1	52						all UV/PV	109	0.33945			88	0.295455			27	0.407407
	PRRT2	1	53
	NAA15	1	54
	MT-ATP6	1	55
	MBD5	1	56
	KCNT1	1	57
	KCNA1	1	58
	CACNA1G	1	59
	ZBTB18	1	60
	IQSEC2	1	61
	GRIN2B	1	62
	RORB	1	63
	WDR26	1	64
	SETD1A	1	65
	TSC2	1	66
	SLC6A1	1	67
	COL4A1	1	68
	ARID1B	1	69
	GRIN2A	1	70
	ASH1L	1	71
	ARHGEF9	1	72
	ARFGEF2	1	73
	GABRA1	1	74
	SETD5	1	75
	BCL11A	1	76
	L1CAM	1	77
	EIF2B2	1	78
	GRIN1	1	79
	STAMBP	1	80
	RELN	1	81
	PLP1	1	82
	NR0B2	1	83
	NCDN	1	84
	LYST	1	85
	KDM6B	1	86
	CHD4	1	87
	CACNA1E	1	88
	YWHAG	1	89
	SLC6A8	1	90
	SLC16A2	1	91
	PCDH19	1	92
	DYNC1H1	1	93
	ACTN2	1	94
	EPM2A	1	95
	POLG	1	96
	STX1B	1	97
	ATP1A3	1	98
	AP2M1	1	99
	MTOR	1	100
	FBXO11	1	101
	KMT2C	1	102
	HCFC1	1	103
	KIF11	1	104
	PPP2R5D	1	105
	FBN1	1	106
	SHANK3	1	107
	TRPM6	1	108
	KCNQ2	1	109

## Sheet: Table 3
all patients	Genes VUS/PV (this study)	Unique Genes (#83)	Cases per gene (#109)	Actionable Genes in this study (#17)	Actiobale cases (this study #37)			patients ≤12	Genes VUS/PV (this study)	Unique Genes (#68)	Cases per gene (#86)	Actionable Genes in this study (#13)	Actiobale cases (this study #26)		patients >12	Genes VUS/PV (this study)	Unique Genes (#19)	Cases per gene (#15)	Actionable Genes in this study (#8)	Actiobale cases (this study #11)				Neuro Genet 2021 actionable+POLG
	SETD2	SETD2	1	SCN2A	3				SETD2	SETD2	1	SCN2A	2			SCN2A	SCN2A	1	SCN2A	1				ALDH7A1
	SCN2A	SCN2A	3	STXBP1	1				SCN2A	SCN2A	2	STXBP1	1			SCN8A	SCN8A	2	SCN8A	2				ATP1A3
	SCN2A	ETHE1	1	CDKL5	1				SCN2A	ETHE1	1	CDKL5	1			MECP2	MECP2	1	EPM2A	1				CACNA1A
	ETHE1	STXBP1	1	SCN1A	11				ETHE1	STXBP1	1	SCN1A	8			EPM2A	EPM2A	1	POLG	1				CDKL5
	STXBP1	KIF5C	1	PRRT2	1				STXBP1	KIF5C	1	PRRT2	1			POLG	POLG	1	ATP1A3	1				CHD2
	KIF5C	CASK	1	KCNT1	1				KIF5C	CASK	1	KCNT1	1			ATP1A3	ATP1A3	1	SCN1A	3				DEPDC5
	CASK	JAM3	1	TSC2	1				CASK	JAM3	1	TSC2	1			AP2M1	AP2M1	1	SLC2A1	1				EPM2A
	JAM3	CAD	1	SCN8A	4				JAM3	CAD	1	SCN8A	2			SCN8A	MTOR	1	KCNQ2	1				GLRA1
	CAD	PACS2	1	CACNA1A	5				CAD	PACS2	1	CACNA1A	5			MTOR	FBXO11	1	all	11				KCNH2
	PACS2	MT-TK	1	SLC6A1	1				PACS2	MT-TK	1	SLC6A1	1			FBXO11	KMT2C	1						KCNQ2
	MT-TK	CDKL5	1	SLC2A1	2				MT-TK	CDKL5	1	SLC2A1	1			KMT2C	HCFC1	1						KCNT1
	CDKL5	SNAP25	1	SLC6A8	1				CDKL5	SNAP25	1	SLC6A8	1			HCFC1	KIF11	1						LGI1
	SNAP25	SLC13A5	1	PCDH19	1				SNAP25	SLC13A5	1	PCDH19	1			KIF11	SCN1A	3						NHLRC1
	SLC13A5	SCN1A	11	EPM2A	1				SLC13A5	SCN1A	8	all	26			SCN1A	PPP2R5D	1						NPRL3
	SCN1A	CSNK2B	1	POLG	1				SCN1A	CSNK2B	1					PPP2R5D	FBN1	1						PCDH19
	SCN1A	CAMTA1	1	ATP1A3	1				SCN1A	CAMTA1	1					FBN1	SHANK3	1						PRRT2
	SCN1A	ANKRD11	1	KCNQ2	1				SCN1A	ANKRD11	1					SHANK3	TRPM6	1						SCN1A
	CSNK2B	FLNA	1	all	37				CSNK2B	FLNA	1					TRPM6	SLC2A1	1						SCN2A
	CAMTA1	SLC1A3	1						CAMTA1	SLC1A3	1					SLC2A1	KCNQ2	1						SCN8A
	ANKRD11	RORA	1						ANKRD11	RORA	1					SCN1A	all	15						SLC2A1
	SCN1A	PRRT2	1						SCN1A	PRRT2	1					KCNQ2								SLC6A1
	FLNA	NAA15	1						FLNA	NAA15	1					SCN1A								SLC6A8
	SLC1A3	MT-ATP6	1						SLC1A3	MT-ATP6	1													STXBP1
	SCN1A	MECP2	2						SCN1A	MECP2	1													TSC1
	RORA	MBD5	1						RORA	MBD5	1													TSC2
	PRRT2	KCNT1	1						PRRT2	KCNT1	1													POLG
	NAA15	KCNA1	1						NAA15	KCNA1	1
	MT-ATP6	CACNA1G	1						MT-ATP6	CACNA1G	1
	MECP2	ZBTB18	1						MECP2	ZBTB18	1
	MBD5	IQSEC2	1						MBD5	IQSEC2	1
	KCNT1	SETD1B	5						KCNT1	SETD1B	5
	KCNA1	GRIN2B	1						KCNA1	GRIN2B	1
	CACNA1G	RORB	1						CACNA1G	RORB	1
	ZBTB18	WDR26	1						ZBTB18	WDR26	1
	IQSEC2	SETD1A	1						IQSEC2	SETD1A	1
	SETD1B	TSC2	1						SETD1B	TSC2	1
	GRIN2B	SCN8A	4						GRIN2B	SCN8A	2
	RORB	CACNA1A	5						RORB	CACNA1A	5
	SETD1B	SLC6A1	1						SETD1B	SLC6A1	1
	WDR26	COL4A1	1						WDR26	COL4A1	1
	SETD1A	SLC2A1	2						SETD1A	SLC2A1	1
	TSC2	ARID1B	1						TSC2	ARID1B	1
	SCN8A	GRIN2A	1						SCN8A	GRIN2A	1
	CACNA1A	ASH1L	1						CACNA1A	ASH1L	1
	SLC6A1	ARHGEF9	1						SLC6A1	ARHGEF9	1
	COL4A1	ARFGEF2	1						COL4A1	ARFGEF2	1
	SLC2A1	GABRA1	1						SLC2A1	GABRA1	1
	CACNA1A	SETD5	1						CACNA1A	SETD5	1
	ARID1B	BCL11A	1						ARID1B	BCL11A	1
	GRIN2A	L1CAM	1						GRIN2A	L1CAM	1
	SETD1B	EIF2B2	1						SETD1B	EIF2B2	1
	CACNA1A	GRIN1	1						CACNA1A	GRIN1	1
	ASH1L	CDC6	2						ASH1L	CDC6	2
	ARHGEF9	STAMBP	1						ARHGEF9	STAMBP	1
	ARFGEF2	RELN	1						ARFGEF2	RELN	1
	CACNA1A	PLP1	1						CACNA1A	PLP1	1
	GABRA1	NR0B2	1						GABRA1	NR0B2	1
	SCN8A	NCDN	1						SCN8A	NCDN	1
	SETD5	LYST	1						SETD5	LYST	1
	BCL11A	KDM6B	1						BCL11A	KDM6B	1
	SETD1B	CHD4	1						SETD1B	CHD4	1
	SETD1B	CACNA1E	1						SETD1B	CACNA1E	1
	SCN1A	YWHAG	1						SCN1A	YWHAG	1
	L1CAM	SLC6A8	1						L1CAM	SLC6A8	1
	EIF2B2	SLC16A2	1						EIF2B2	SLC16A2	1
	GRIN1	PCDH19	1						GRIN1	PCDH19	1
	SCN1A	DYNC1H1	1						SCN1A	DYNC1H1	1
	CDC6	ACTN2	1						CDC6	ACTN2	1
	CDC6	EPM2A	1						CDC6	all	86
	CACNA1A	POLG	1						CACNA1A
	SCN1A	STX1B	1						SCN1A
	STAMBP	ATP1A3	1						STAMBP
	RELN	AP2M1	1						RELN
	PLP1	MTOR	1						PLP1
	NR0B2	FBXO11	1						NR0B2
	NCDN	KMT2C	1						NCDN
	LYST	HCFC1	1						LYST
	KDM6B	KIF11	1						KDM6B
	CHD4	PPP2R5D	1						CHD4
	CACNA1E	FBN1	1						CACNA1E
	YWHAG	SHANK3	1						YWHAG
	SLC6A8	TRPM6	1						SLC6A8
	SLC16A2	KCNQ2	1						SLC16A2
	PCDH19	all	109						PCDH19
	DYNC1H1								DYNC1H1
	ACTN2								ACTN2
	SCN2A
	SCN8A
	MECP2
	EPM2A
	POLG
	STX1B
	ATP1A3
	AP2M1
	SCN8A
	MTOR
	FBXO11
	KMT2C
	HCFC1
	KIF11
	SCN1A
	PPP2R5D
	FBN1
	SHANK3
	TRPM6
	SLC2A1
	SCN1A
	KCNQ2
	SCN1A
							FALSE

## Sheet: Table 4
only 0-12 (#70)	common genes 0-12, >12 (#13)	only >12 (#0)
SETD2	SCN2A	n/a
ETHE1	STXBP1
KIF5C	CDKL5
CASK	SCN1A
JAM3	PRRT2
CAD	KCNT1
PACS2	TSC2
MT-TK	SCN8A
SNAP25	CACNA1A
SLC13A5	SLC6A1
CSNK2B	SLC2A1
CAMTA1	SLC6A8
ANKRD11	PCDH19
FLNA
SLC1A3
RORA
NAA15
MT-ATP6
MECP2
MBD5
KCNA1
CACNA1G
ZBTB18
IQSEC2
SETD1B
GRIN2B
RORB
WDR26
SETD1A
COL4A1
ARID1B
GRIN2A
ASH1L
ARHGEF9
ARFGEF2
GABRA1
SETD5
BCL11A
L1CAM
EIF2B2
GRIN1
CDC6
STAMBP
RELN
PLP1
NR0B2
NCDN
LYST
KDM6B
CHD4
CACNA1E
YWHAG
SLC16A2
DYNC1H1
ACTN2
EPM2A
POLG
STX1B
ATP1A3
AP2M1
MTOR
FBXO11
KMT2C
HCFC1
KIF11
PPP2R5D
FBN1
SHANK3
TRPM6
KCNQ2
